# Supplementary material for: Bortezomib-induced miRNAs direct epigenetic silencing of locus genes and trigger apoptosis in leukemia
Source: PubMed Central journal article supplement (PMC5775404; doi:10.1038/cddis.2017.520), 2017-11-09
Supplement: cddis2017520x1.pdf [file cddis2017520x1.pdf]

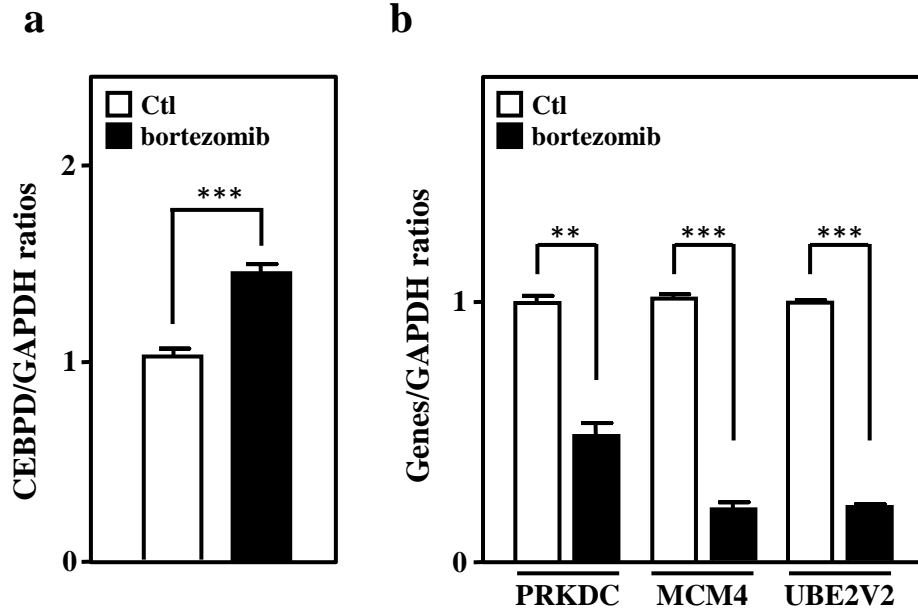

**Supplementary Figure S1** Bortezomib contributes to *CEBPD* transcriptional activation and inhibits the expression of *PRKDC*, *MCM4* and *UBE2V2* genes in U937 cells. After treating with bortezomib (50 nM) for 3 h (**a**) or 16 h (**b**) in U937 cells, total RNA was harvested and qPCR was performed to check the expression of *CEBPD* or its 5'-flanking genes (*PRKDC*, *MCM4* and *UBE2V2*). The data represented the mean  $\pm$  standard error of experiments performed in triplicate. (\*\* $p < 0.01$ , \*\*\* $p < 0.001$ , Student's *t*-test).

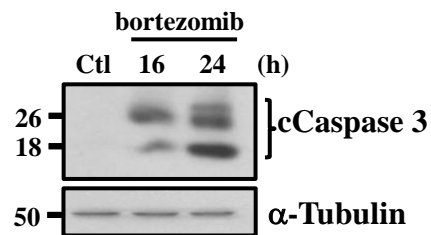

**Supplementary Figure S2** Bortezomib increases the signals of activated caspase 3 in leukemia cells. After bortezomib treatment for 16 h and 24 h in THP-1 cells, protein lysates were harvested to perform Western blot analysis.

**a**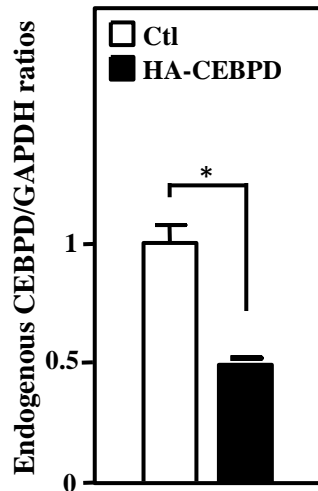**b**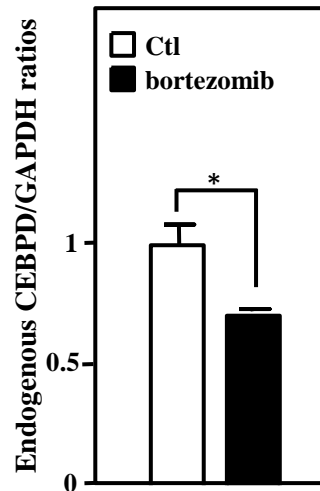

**Supplementary Figure S3** Exogenous expression of HA-CEBPD and long term bortezomib treatment attenuate endogenous CEBPD transcripts. THP-1 cells (a) were transfected with HA-CEBPD for 18 h or (b) treated with bortezomib (50 nM) for 18 h. Total RNA was harvested and qPCR was used to analyze the expression of CEBPD. The data represented the mean  $\pm$  standard error of experiments performed in triplicate. (\* $p < 0.05$ , Student's  $t$ -test).

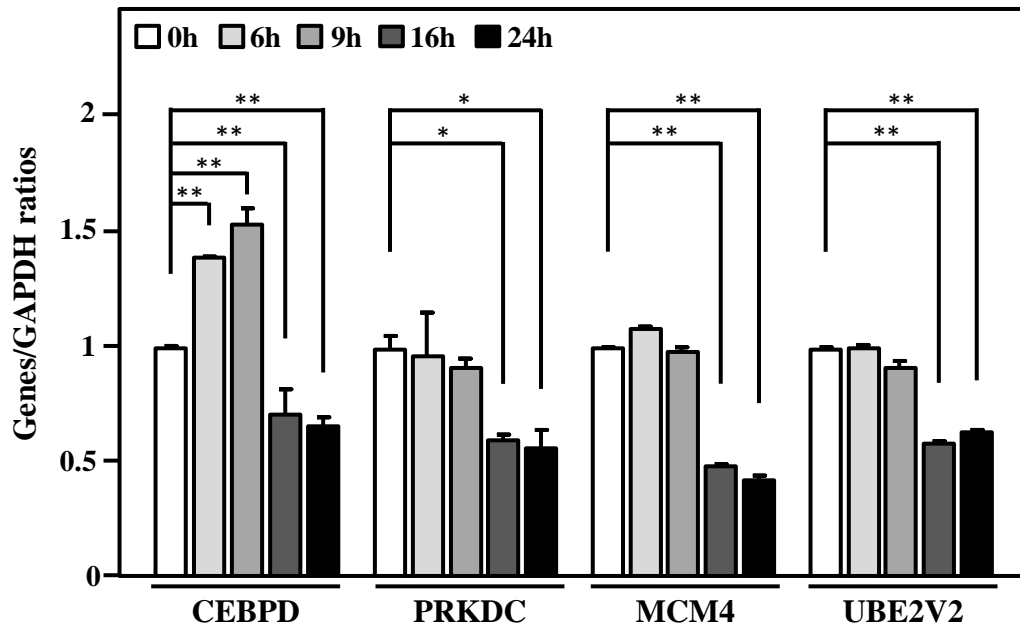

**Supplementary Figure S4** PRKDC, MCM4 and UBE2V2 genes are attenuated in parallel with the decrease in CEBPD transcription upon bortezomib treatment. THP-1 cells were treated with bortezomib (50 nM). Total RNA was harvested at the indicated time points and qPCR was used to analyze the expression of genes (*CEBPD*, *PRKDC*, *MCM4*, and *UBE2V2*). The data represented the mean  $\pm$  standard error of experiments performed in triplicate. (\* $p < 0.05$ , \*\* $p < 0.01$ , Student's *t*-test).

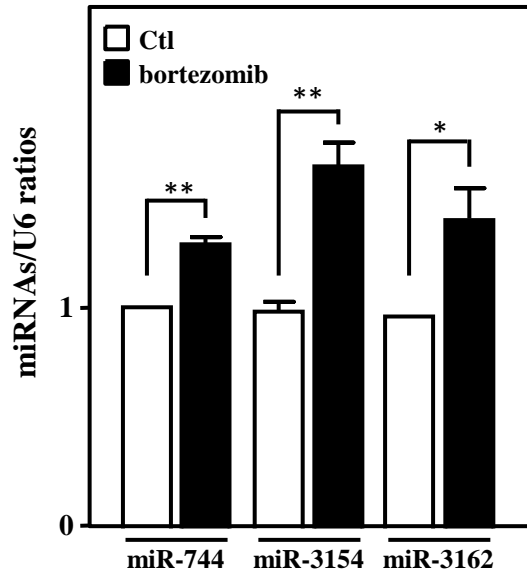

**Supplementary Figure S5** Bortezomib increases miR-744, miR-3154 and miR-3162 expression. qPCR was performed using total RNA harvested from U937 cells treated with bortezomib (50 nM) for 6 h. The data represented the mean  $\pm$  standard error of experiments performed in triplicate. (\* $p < 0.05$ , \*\* $p < 0.01$ , Student's  $t$ -test).

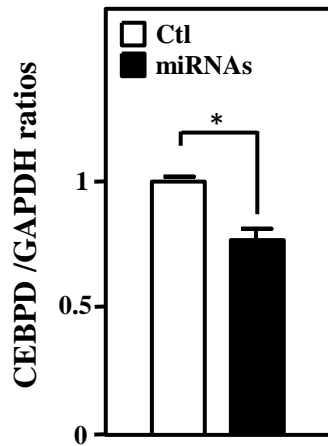

**Supplementary Figure S6** Exogenous miR-744, miR-3154 and miR-3162 suppress the transcription of CEBPD. THP-1 cells were co-transfected with miR-744, miR-3154 and miR-3162 expression vectors for 18 h. Total RNA was harvested and qPCR was used to analyze the expression of CEBPD. The data represented the mean  $\pm$  standard error of experiments performed in triplicate. (\* $p < 0.05$ , Student's  $t$ -test).

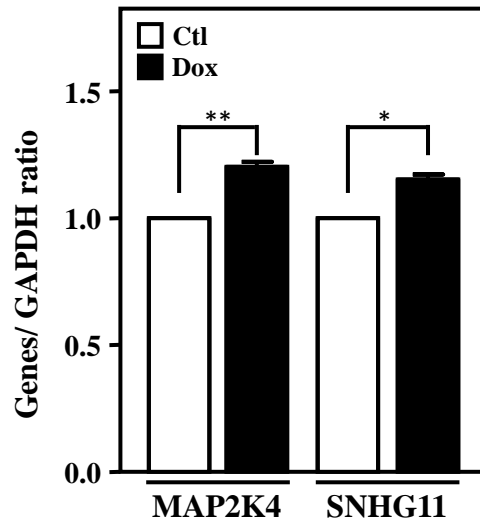

**Supplementary Figure S7** CEBPD induces *MAP2K4* and *SKHG11* expression. After Dox (1 ug/ml) treatment in THP-1 cells with HA-CEBPD inducible system for 3 h, total RNA was harvested to perform the qPCR analysis. The data represented the mean  $\pm$  standard error of experiments performed in triplicate. (\* $p < 0.05$ , \*\* $p < 0.01$ , Student's *t*-test).

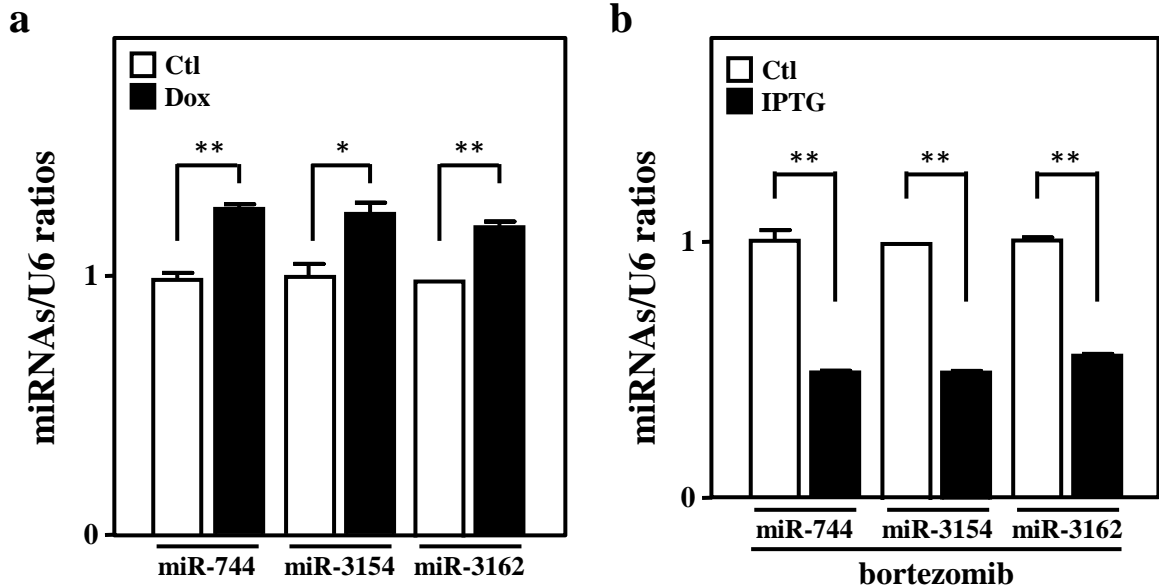

**Supplementary Figure S8** miR-744, miR-3154 and miR-3162 levels are checked in Dox-inducible or IPTG inducible-silencing system. (a) After Dox treatment for 24 h, total RNA was harvested, and the levels of miRNAs (miR-744, miR-3154 and miR-3162) were confirmed by qPCR. (b) THP-1 cells with the IPTG-inducible silencing miR-744/3154/3162 system were pre-treated with IPTG (500  $\mu$ M) for 3 h. After bortezomib (50 nM) for 16 h, the expression levels of miR-744, miR-3154 and miR-3162 were measured by qPCR. The data represented the mean  $\pm$  standard error of experiments performed in triplicate. (\* $p < 0.05$ , \*\* $p < 0.01$ , Student's  $t$ -test).



**Supplementary Table 1 CEBPD down-regulated mRNAs (fold<1.5)**

|                |                     |                |                  |
|----------------|---------------------|----------------|------------------|
| CCL14          | lnc-SNTG1-1         | lnc-AKIP1-2    | ZFP42            |
| XLOC_12_010691 | FNL3                | lnc-GEMIN2-2   | lnc-HMCN1-2      |
| KRT40          | lnc-HSPB11-1        | XLOC_12_015075 | FAM150A          |
| LOC100422737   | lnc-RPL30-2         | lnc-DRD5-8     | TFEC-2           |
| LOC100134423   | lncC2CD4A-7         | lncERG-1       | SIK1-4           |
| lncARL4A-2     | lncAC009365.3.1-4   | GADD45G        | MAGEE1           |
| lncNADSYN12    | ABCA9-AS1           | XLOC_12_011098 | EFHD1            |
| LOC729970      | LINC01339           | LINC00222      | SBSN             |
| LOC101928697   | lnc-NAV1-1          | FAM110B        | NAV2-AS5         |
| DCAF8L1        | lnc-CNIH-1          | LOC101926928   | APOL3            |
| XLOC_12_012107 | lnc-UBAP2-1         | LOC101927389   | lnc-TAB3-1       |
| H2BFWT         | lnc-ZNF675-1        | lnc-RAB40B-1   | MED15P9          |
| FAM189A2       | lnc-BTG3-2          | lnc-TPCN2-3    | lnc-RUNX2-1      |
| lnc-GREM2-8    | lnc-FAM131B-1       | LINC01501      | IFNA7            |
| KLK14          | LOC101929294        | LOC101929073   | lnc-FMN2-1       |
| C12orf54       | TMEM219             | lnc-NUMB-2     | lnc-CCT4-1       |
| lncGABARAPL3-2 | lnc-BTNL8-2         | LINC01146      | DNAH10           |
| LINC01021      | FER1L6              | lnc-GABRA5-4   | lnc-MARCH7-2     |
| SMAD1-AS1      | lnc-SLC38A2-1       | LOC101928674   | lnc-BSND-1       |
| lnc-ALG14-2    | lnc-TAX1BP3-1       | lnc-VAPB-1     | lnc-EIF2AK3-1    |
| LOC101928117   | lnc-NVL-3           | THPO;PTK2      | RGS4             |
| CD72           | SNORD112            | lnc-SULF1-1    | CXCL3            |
| lnc-TNFRSF19-5 | lncRP11-791J7.2.1-1 | lnc-LY86-3     | XLOC_12_013547   |
| lnc-IWS1-1     | LPP-AS1             | lnc-GPRC5A-2   | lnc-PLEKHA5-4    |
| lnc-BCHE-1     | BMP3                | MIAT           | lnc-KHDRBS3-5    |
| lnc-TRIB1-3    | LOC101929284        | LOC102724973   | lnc-CR392000.1-1 |
| MYO16-AS1      | LOC401134           | LINC01257      | lnc-RGL4-4       |
| lncEXOC2-5     | lncTTC33-1          | LINC01305      | ASB11            |

|                     |                       |                |                |
|---------------------|-----------------------|----------------|----------------|
| OR52B2              | XLOC_12_000399        | XLOC_12_001196 | lnc-TUFM-3     |
| LOC399886           | XLOC_12_007237        | TSC22D1-AS1    | lnc-ANP32A-3   |
| lnc-TRIML2-3        | C18orf61              | KLHL34         | TCN1           |
| lncRP11-410N8.4.1-1 | lnc-LEPROT-1          | lnc-UTP11L-4   | lnc-SLC2A4RG-1 |
| lnc-TAS2R42-1       | MGAM                  | SHISA9-2       | AGAP2-AS1      |
| USP43               | lnc-RP11-680F20.6.1-1 | lnc-DHX37-7    | QRICH2         |
| XLOC_12_014245      | HID1                  | SPPL2B         | ALKBH8         |
| lnc-TXNRD1-1        | XLOC_12_015098        | XLOC_12_009889 | ACP5           |
| MAMDC2-AS1          | lnc-PDGFA-2;          | LINC00664      | XLOC_12_007449 |
| LOC100996890        | lnc-C14orf118-1       | LIPE           | lnc-NDUFS5-2   |
| lnc-NACA2-2         | lnc-LTN1-1            | LOC102606466   | LOC101927132   |
| LOC644083           | lnc-SFN-1             | lnc-ABT1-4     | lnc-HOXC4-4    |
| lnc-AC092327.1-3    | lnc-DIAPH1-2          | lnc-GIT1-1     | lnc-RTL1-6     |
| FAM41C              | ZNF442                | ZACN           | KIAA1958       |
| lnc-IL17B-3         | lnc-C19orf26-2        | lnc-ZNF516-4   | DUSP9          |
| IL26                | lnc-SYNM-2            | TTC39A-AS1     | LOC101927604   |
| PTCHD1-AS           | FAM198A               | SMKR1          | lnc-TFB2M-2    |
| lnc-PPFIA2-1        | lnc-BCAN-1            | XLOC_12_013328 | FAM83A         |
| lncENDOD1-1         | LOC101928106          | LOC100129034   | lnc-ZNF572-1   |
| NRG3AS1             | lnc-PRKAA2-1          | lnc-LGALS14-1  | lnc-GPT2-1     |
| A2MP1               | PADI6                 | NIPAL4         | COL24A1        |
| PIGC                | HCFC1-AS1             | lnc-TOR2A-1    | EFCC1          |
| APOL5               | lnc-LPIN3-1           | LOC101927389   | lnc-MFSD9-4    |
| LOC101929261        | LOC255654             | LOC101928424   | lnc-RRP8-1     |
| LOC102724712        | KIAA1671              | VWA5B1         | lnc-POTEB-5    |
| LOC283332           | lnc-C5orf63-3         | lnc-SLC29A4-1  | UNC5C          |
| LINC00518           | lnc-RAMP3-2           | FAAHP1         | lnc-FBXO7-1    |
| SNORA19             | lnc-COL19A1-1         | OR7D2          | LOC102723481   |

|                |                |                |                    |
|----------------|----------------|----------------|--------------------|
| FAM182B        | LOC102724861   | KLK1           | NCAN               |
| lnc-MYB-3      | lnc-AC092117   | SMN2           | LOC100507494       |
| lnc-NKX2-5-2   | lnc-DRD5-3     | TDRD3          | LINC00243          |
| TMEM262        | LOC100506801   | lnc-RP11-728F  | LOC100289455       |
| OR2G2          | ZNF713         | IQSEC3         | SNORA23            |
| lnc-HRH4-9     | LOC100128591   | ZBTB37         | ASAH2              |
| lnc-STX2-6     | TNXB           | lnc-CCDC23-1   | LINC01550          |
| MFAP5          | lnc-SELV.1-1   | lnc-ATG16L2-4  | BAI2               |
| lnc-CALCOCO2-5 | lnc-FAM82A1-2  | LOC101927187   | WDR91              |
| lnc-IKZF2-2    | lnc-POTEB-4    | lnc-GPCPD1-1   | RFPL3S             |
| lnc-ITSN1-2    | LOC100131907   | LOC100507420   | HCRP1              |
| FEZF1-AS1      | lncCA8-2       | KAZN           | LOC101928108       |
| FAM78B         | lncEIF3A-1     | ZNF174         | SPTSSB             |
| FLJ46363       | LOC283038      | lnc-JMJD4-1    | XLOC_12_01583<br>0 |
| lnc-C20orf96-4 | XLOC_12_012844 | lnc-C2orf63-1  | lnc-MLL3-1         |
| lnc-SYK-3      | UXT-AS1        | lnc-PTGS1-1    | lnc-AGRP-3         |
| LOC283140      | lnc-ZNF536-2   | lnc-ROM1-2     | ANKRD20A12P        |
| ART5           | LOC101929709   | lnc-ANTXRL-2   | lnc-FSCN2-1        |
| lncGIP-1       | lnc-XRN2-3     | TP53TG3C       | lnc-CTXN1-1        |
| LINC00957      | LOC101928701   | TTY2           | lnc-MRPS9-2        |
| MTERF4         | lnc-BCL3-1     | lnc-FRG1-4     | lnc-BMP7-2         |
| GABRG2         | lnc-CRIPAK-1   | lnc-SLCO2B1-2  | YAP1               |
| XLOC_12_005020 | MRPS31P5       | lnc-XRCC3-1    | lnc-CD207-1        |
| SP6            | lnc-CENPV-2    | lnc-AP3M1-1    | TP53TG3            |
| FOXA3          | SVILP1         | SNORA75        | GSTTP2             |
| ZXDA           | TRDMT1         | lncTCTN3-1     | MAFG-AS1           |
| XLOC_12_006832 | LOC102725053   | XLOC_12_013467 | LOC100129620       |
| MDN1           | lnc-CACNA1E-1  | GDNF           | FAM86JP            |

|                |                 |              |
|----------------|-----------------|--------------|
| FAM182B        | XLOC_12_008755  | lnc-TIGD7-1  |
| ACTL8          | C2CD4D          | ZBED6        |
| LOC145837      | LIMS3-LOC440895 | FURIN        |
| lnc-LRRTM1-4   | lnc-AK1-1       | LOC100996249 |
| LCN8           | CD84            | FAHD2A       |
| GHITM          | lnc-WDR33-1     | LOC100130930 |
| IQCF3          | R3HDM1          | TRAF3IP2-AS1 |
| CD247          | lnc-GSDMD-3     | UNC13B       |
| LOC101929450   | XLOC_12_009887  | SNHG4        |
| lnc-MAPK13-1   | lnc-BRD1-3      | lnc-C2-2     |
| SLC35G5        | lnc-SNX33-1     | lnc-TUFM-1   |
| CECR5AS1       | EPHB4           | CCL2         |
| LOC100130370   | lnc-LGALSL-1    | lnc-GLYCTK-1 |
| LOC100130992   | lnc-CARHSP1-1   |              |
| LOC101929260   | lnc-LTBP3-2     |              |
| DDX3Y          | CUX1            |              |
| FOLR2          | LOC101928223    |              |
| LOC101927187   | DTWD2           |              |
| XLOC_12_009510 | OR5A1           |              |
| NR4A2          | lnc-UCHL3-1     |              |
| LOC102724601   | LOC100129931    |              |
| KCNIP2-AS1     | ND4L            |              |
| XLOC_12_010511 | LINC00092       |              |
| lnc-EXT1-2     | C15orf59        |              |
| PIP5KL1        | lnc-ARID2-3     |              |
| KHDRBS3        | lnc-C1QTNF8-4   |              |
| ADAMTS13       | lnc-SH2D7-5     |              |
| lnc-CCDC117-1  | lnc-SOX6-1      |              |

**Supplementary Table 2 CEBPD up-regulated miRNAs (fold >1.2)**

| <b>Name</b>     | <b>fold</b> | <b>Name</b>    | <b>fold</b> |
|-----------------|-------------|----------------|-------------|
| hsa-miR-146a    | 2.840208645 | hsa-miR-4271   | 1.306660292 |
| hsa-miR-744     | 2.106482675 | hsa-miR-612    | 1.301773568 |
| hsa-miR-933     | 1.627204569 | hsa-miR-132    | 1.293610649 |
| hsa-miR-92a-2*  | 1.603911206 | hsa-miR-92b*   | 1.291836835 |
| hsa-miR-3162    | 1.595569915 | hsa-miR-1228*  | 1.283250254 |
| hsa-miR-513c    | 1.574166541 | hsa-miR-658    | 1.281080506 |
| hsa-miR-149*    | 1.546803937 | hsa-miR-30a    | 1.277662919 |
| hsa-miR-939     | 1.509907844 | hsa-miR-1915   | 1.275511776 |
| hsa-miR-762     | 1.500715455 | hsa-miR-542-5p | 1.272804248 |
| hsa-miR-513a-5p | 1.487809038 | hsa-miR-509-3p | 1.266211636 |
| hsa-miR-4270    | 1.474365813 | hsa-miR-1249   | 1.25650319  |
| hsa-miR-1207-5p | 1.45695961  | hsa-miR-30c-2* | 1.254980699 |
| hsa-miR-3154    | 1.438149847 | hsa-miR-1182   | 1.250235642 |
| hsa-miR-4294    | 1.410622963 | hsa-miR-30b*   | 1.250196982 |
| hsa-miR-30e     | 1.398637323 | hsa-miR-663b   | 1.237967817 |
| hsa-miR-1909    | 1.394264791 | hsa-miR-3156   | 1.233676511 |
| hsa-miR-665     | 1.38588901  | hsa-miR-1275   | 1.231502023 |
| hsa-miR-1246    | 1.370431657 | hsa-miR-650    | 1.230442177 |
| hsa-miR-130b    | 1.362349926 | hsa-miR-320e   | 1.224376136 |
| hsa-miR-1290    | 1.361496976 | hsa-miR-1268   | 1.223864649 |
| hsa-miR-1303    | 1.359036833 | hsa-miR-3195   | 1.223724846 |
| hsa-miR-513b    | 1.355428823 | hsa-miR-3131   | 1.215899386 |
| hsa-miR-765     | 1.350555668 | hsa-miR-3177   | 1.214808724 |
| hsa-miR-483-5p  | 1.3499965   | hsa-miR-711    | 1.214726869 |
| hsa-miR-936     | 1.345067292 | hsa-miR-23a*   | 1.21053193  |
| hsa-miR-493     | 1.337485937 | hsa-miR-1972   | 1.208032741 |
| hsa-miR-1224-3p | 1.336405389 | hsa-miR-675    | 1.207100933 |
| hsa-miR-3196    | 1.323616556 | hsa-miR-920    | 1.206839033 |
| hsa-miR-557     | 1.316007867 | hsa-miR-877    | 1.202246799 |
| hsa-miR-638     | 1.311363949 | hsa-miR-4299   | 1.201790342 |
| hsa-miR-494     | 1.309129272 |                |             |

**Supplementary Table 3 The pairing of mRNAs and miRNAs regulated by CEBPD**

| <b>Gene</b> | <b>miRNA</b>                                                         | <b>Gene</b> | <b>miRNA</b>                                                         |
|-------------|----------------------------------------------------------------------|-------------|----------------------------------------------------------------------|
| SOX30       | miR3154                                                              | ZNF680      | miR3162                                                              |
| LRRTM3      | miR3154, miR1285                                                     | C8orf22     | miR146a                                                              |
| TAT         | miR3154, miR665, miR708                                              | HHATL       | miR1275                                                              |
| PDGFRB      | miR3154, miR665, miR1285, miR3162, miR1275, miR4271, miR4271, miR744 | CHST10      | miR513a, miR665                                                      |
| HKDC1       | miR665                                                               | BGN         | miR1275, miR422a, miR3154, miR4274                                   |
| CNTNAP5     | miR665                                                               | MAGIX       | miR658, miR3177                                                      |
| IGSF11      | miR665, miR1275, miR513a, miR4271                                    | EPHB2       | miR513a, miR665, miR744, miR4271                                     |
| CELF3       | miR1285, miR4271, miR1203, miR422a                                   | BZRAP1      | miR1275, miR422a, miR2861, miR3154                                   |
| LOC200726   | miR455                                                               | XRRA1       | miR1285, miR665                                                      |
| TMTC3       | miR3162                                                              | PDZD3       | miR1275, miR1285, miR744, miR4271                                    |
| CA6         | mir92b                                                               | CROCC       | miR1203, miR1275, miR1285, miR422a, miR513a, miR708, miR744, miR3154 |
| HNRNPA2B1   | miR3154, miR3162                                                     | SLC25A2     | miR3154                                                              |
| TMEM132C    | miR141, miR658                                                       | HSD11B2     | miR665, miR1275                                                      |
| SYNJ2       | miR141, miR4271                                                      | PRRG2       | miR744                                                               |
| RASL10B     | miR1285, miR3154, miR4271                                            | TLN1        | miR744, miR4271                                                      |
| LIN28A      | miR3154, miR4271                                                     | C1QTNF5     | miR665                                                               |
| DUSP22      | miR1203, miR1275, miR1285, miR744, miR3162, miR4271                  | NYAP1       | miR1285, miR4271                                                     |
| FMO4        | miR2861                                                              | OPRM1       | miR422a, miR3154, miR4271                                            |
| ABO         | miR92b                                                               | SOX15       | miR146a                                                              |
| TTLL9       | miR665                                                               | PRDM9       | miR665                                                               |

|          |                                                   |         |                                                             |
|----------|---------------------------------------------------|---------|-------------------------------------------------------------|
| ZNF620   | miR1285                                           | OBSCN   | miR658, miR3154                                             |
| USF1     | miR513a, miR4271                                  | RREB1   | miR665                                                      |
| RTN3     | miR146a, miR708, miR4271                          | XPO5    | miR146a, miR3154, miR3162                                   |
| CPSF2    | miR1285, miR146a, miR605, miR708, miR92b, miR4271 | SYNGAP1 | miR1275, miR3154, miR4271                                   |
| FGD5     | miR1275, miR513a                                  | SDC1    | miR3162, miR4274                                            |
| APOL4    | miR494                                            | IL1R1   | miR665, miR3162, miR4271                                    |
| NOTCH2NL | miR3154, miR4271                                  | MBD6    | miR665, miR92b, miR3154, miR4271                            |
| RAB7A    | miR3154, miR4271                                  | RAX     | miR744, miR92b                                              |
| SORBS2   | miR1275, miR1285, miR665                          | DDX10   | miR3154, miR3162, miR4271                                   |
| DCLRE1C  | miR1285, miR422a                                  | ADAM11  | miR665, miR744, miR4271                                     |
| CUL9     | miR1285, miR146a, miR665                          | PHF8    | miR1285, miR665, miR4271                                    |
| DLL3     | miR1285                                           | LIMD1   | miR1285, miR513a, miR3154                                   |
| FZD9     | miR1285                                           | ZNF81   | miR1275, miR1285, miR141, miR3162                           |
| GPX7     | miR513a                                           | PNMAL2  | miR1275, miR1285, miR658, miR744, miR3162, miR3177          |
| LOXL3    | miR92b                                            | AAK1    | miR1275, miR1285, miR141, miR513a, miR665, miR3162, miR4271 |
| MYNN     | miR146a                                           | NCR3    | miR1275, miR4271                                            |
| YAP1     | miR1285, miR141, miR665, miR4271                  | ALG1    | miR513a                                                     |
| DCBLD2   | miR665                                            | LIMS2   | miR744, miR4271                                             |
| LYPLA2   | miR1285, miR513a, miR665                          | POLL    | miR1285, miR141, miR3154                                    |
| DCUN1D2  | miR1285                                           | SEC62   | miR658, miR665, miR82b, miR4271                             |
| SLC5A6   | miR1275, miR141, miR513a, miR658, miR4271         | DGKZ    | miR1203, miR665, miR4271                                    |
| PHF21A   | miR1285, miR665, miR4271                          |         |                                                             |
